# Supplementary material
Source: publisher figshare collection journal article supplement (https://gsajournals.figshare.com/articles/dataset/_/14356598)
Supplement: Supplementary file 1 [file 1]

## Supplementary Figures

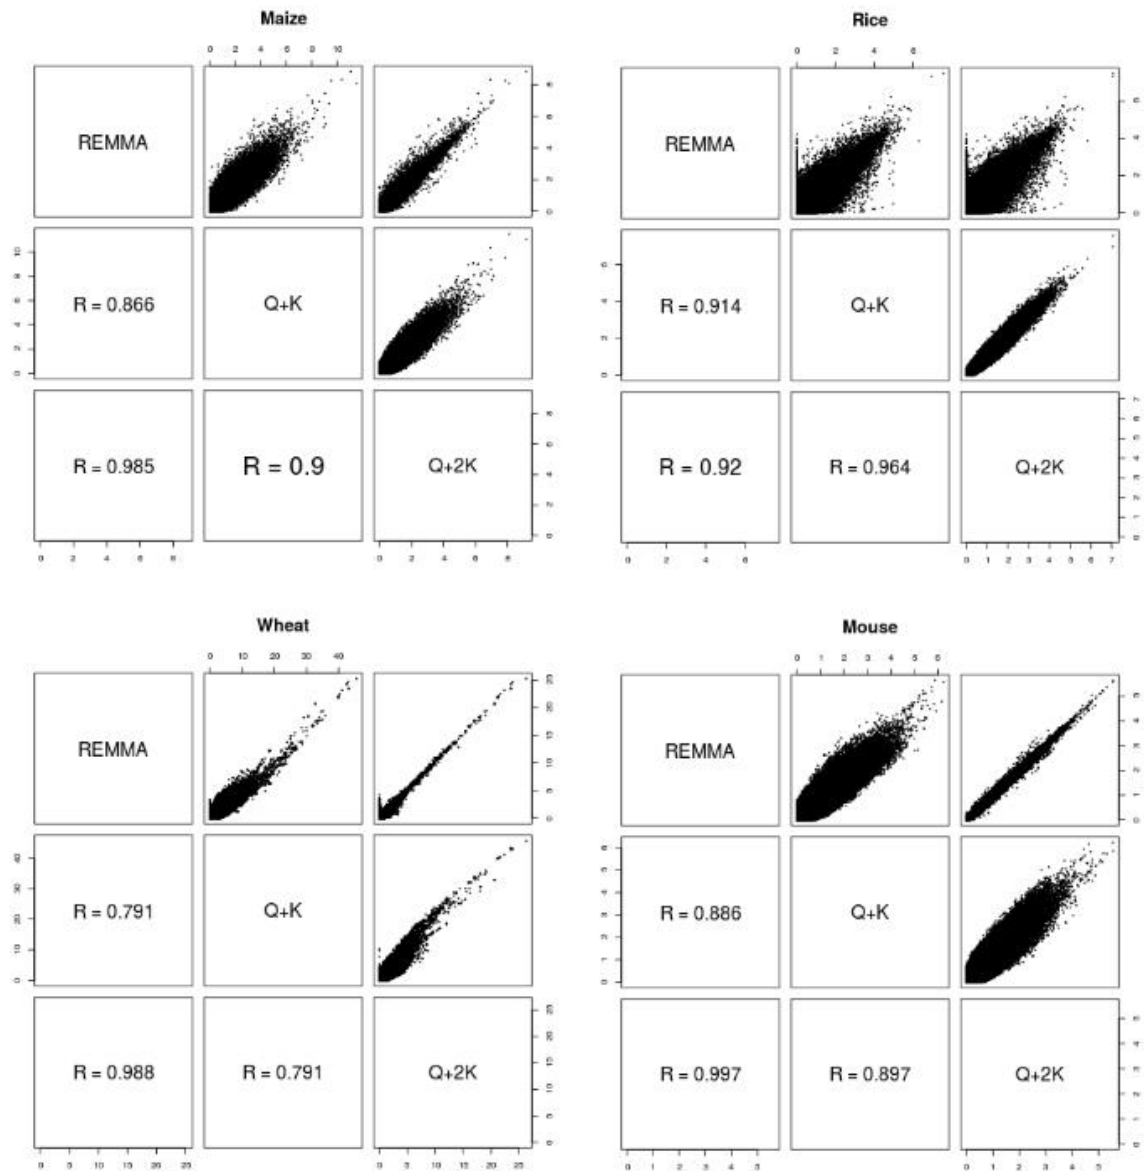

**Figure S1.** Comparison of the  $-\log_{10}(p)$  values for epistatic effects obtained using the REMMA, Q+K and Q+2K model in the four empirical data sets. In each panel, the  $-\log_{10}(p)$  values in each model were plotted against each of the other models in the upper-triangular part. The correlation between the  $-\log_{10}(p)$  values for each pair of models was shown in the lower-triangular part.

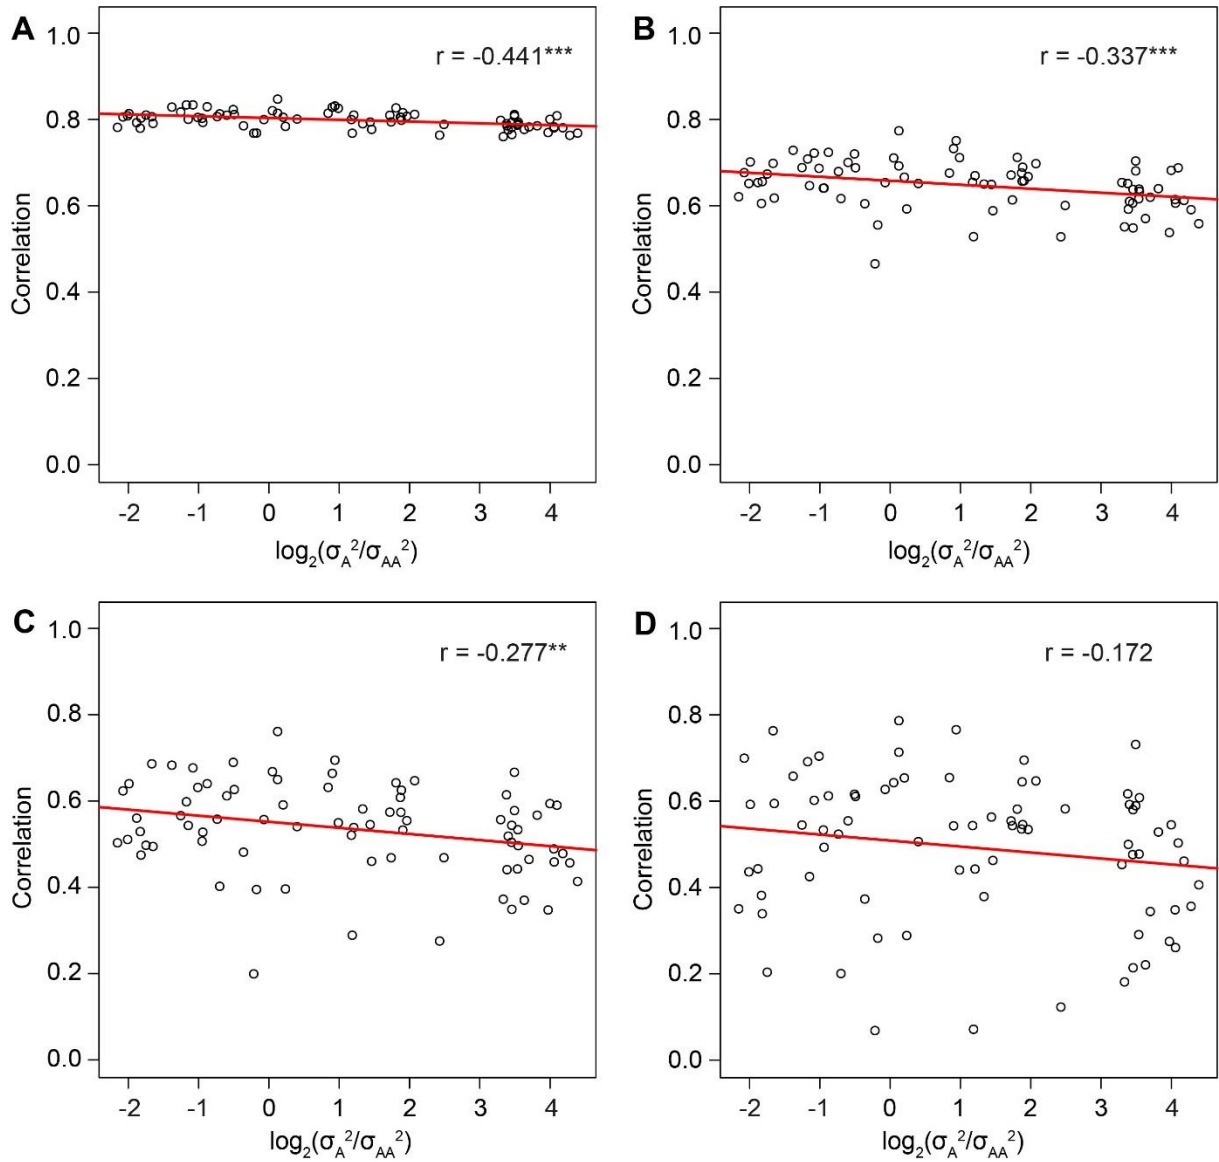

**Figure S2.** The correlations between the  $-\log_{10}(p)$  values for the epistatic effects obtained using the REMMA and the Q+2K model in simulated data sets with  $0.4 \leq h^2 < 0.7$  and different  $\sigma_A^2/\sigma_{AA}^2$  ratios. Each point in the figure represented the correlation between the  $-\log_{10}(p)$  values from the two models calculated in a specific simulated data set. The overall correlation between the correlations and the  $\log_2(\sigma_A^2/\sigma_{AA}^2)$  values across all data sets was displayed as the  $r$  value together with an indication of significance ( $*p < 0.1$ ,  $**p < 0.05$ ,  $***p < 0.01$ ). A threshold of  $-\log_{10}(p)$  values was applied to filter the marker pairs. Namely, only the marker pairs whose  $-\log_{10}(p)$  values were above the threshold in at least one of the two models were considered. In different panels, distinct threshold values were applied: A) 1, B) 2, C) 3 and D) 4.

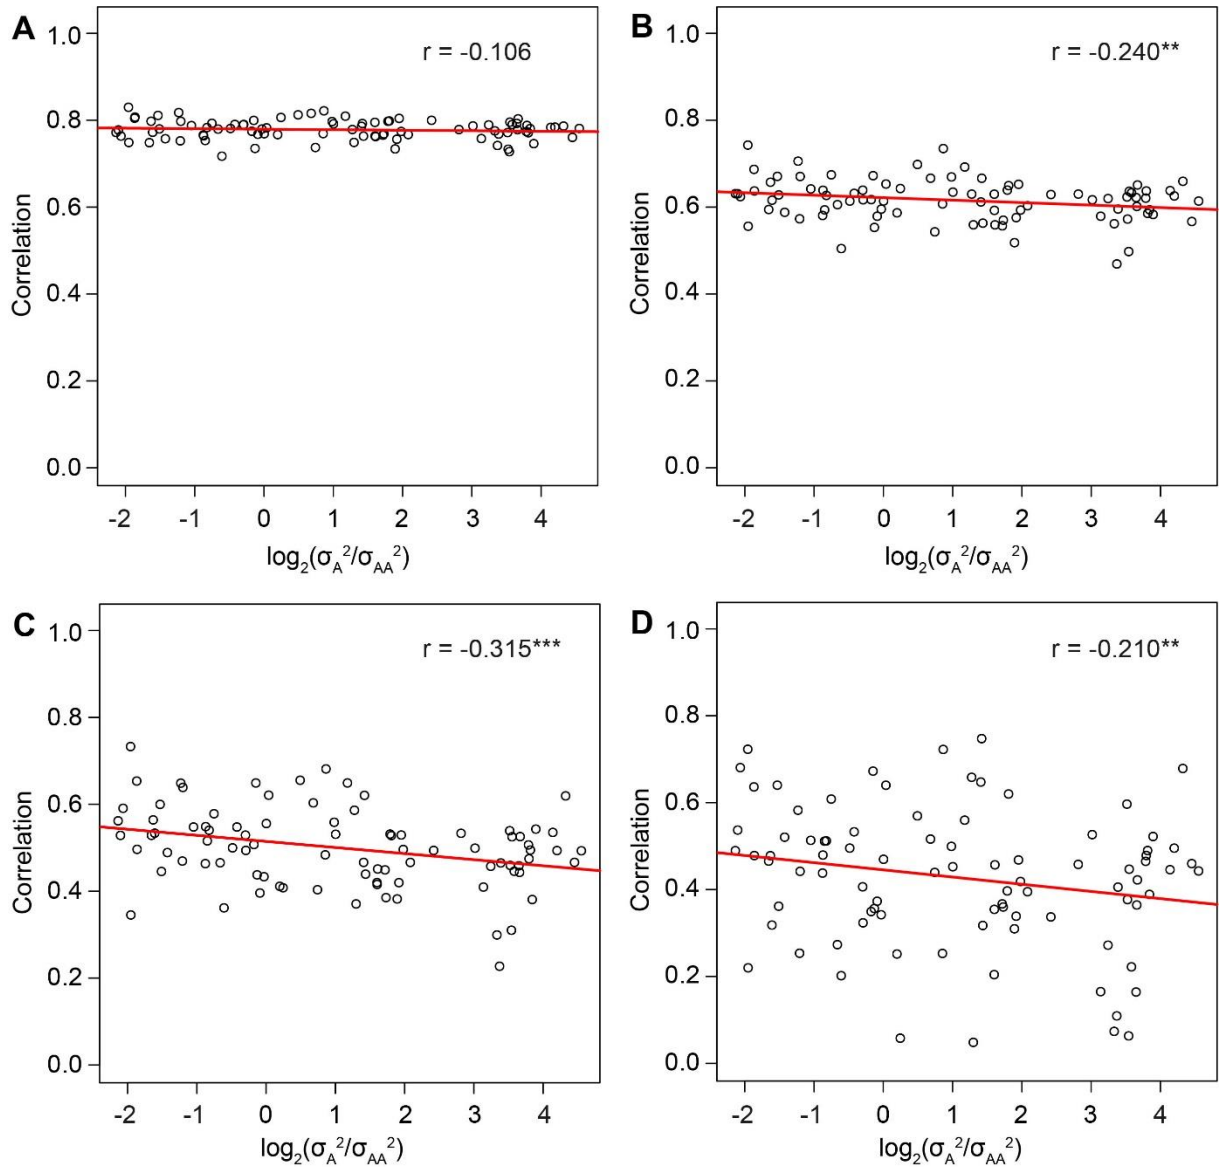

**Figure S3.** The correlations between the  $-\log_{10}(p)$  values for the epistatic effects obtained using the REMMA and the Q+2K model in simulated data sets with  $h^2 < 0.4$  and different  $\sigma_A^2/\sigma_{AA}^2$  ratios. Each point in the figure represented the correlation between the  $-\log_{10}(p)$  values from the two models calculated in a specific simulated data set. The overall correlation between the correlations and the  $\log_2(\sigma_A^2/\sigma_{AA}^2)$  values across all data sets was displayed as the  $r$  value together with an indication of significance ( $*p < 0.1$ ,  $**p < 0.05$ ,  $***p < 0.01$ ). A threshold of  $-\log_{10}(p)$  values was applied to filter the marker pairs. Namely, only the marker pairs whose  $-\log_{10}(p)$  values were above the threshold in at least one of the two models were considered. In different panels, distinct threshold values were applied: A) 1, B) 2, C) 3 and D) 4.

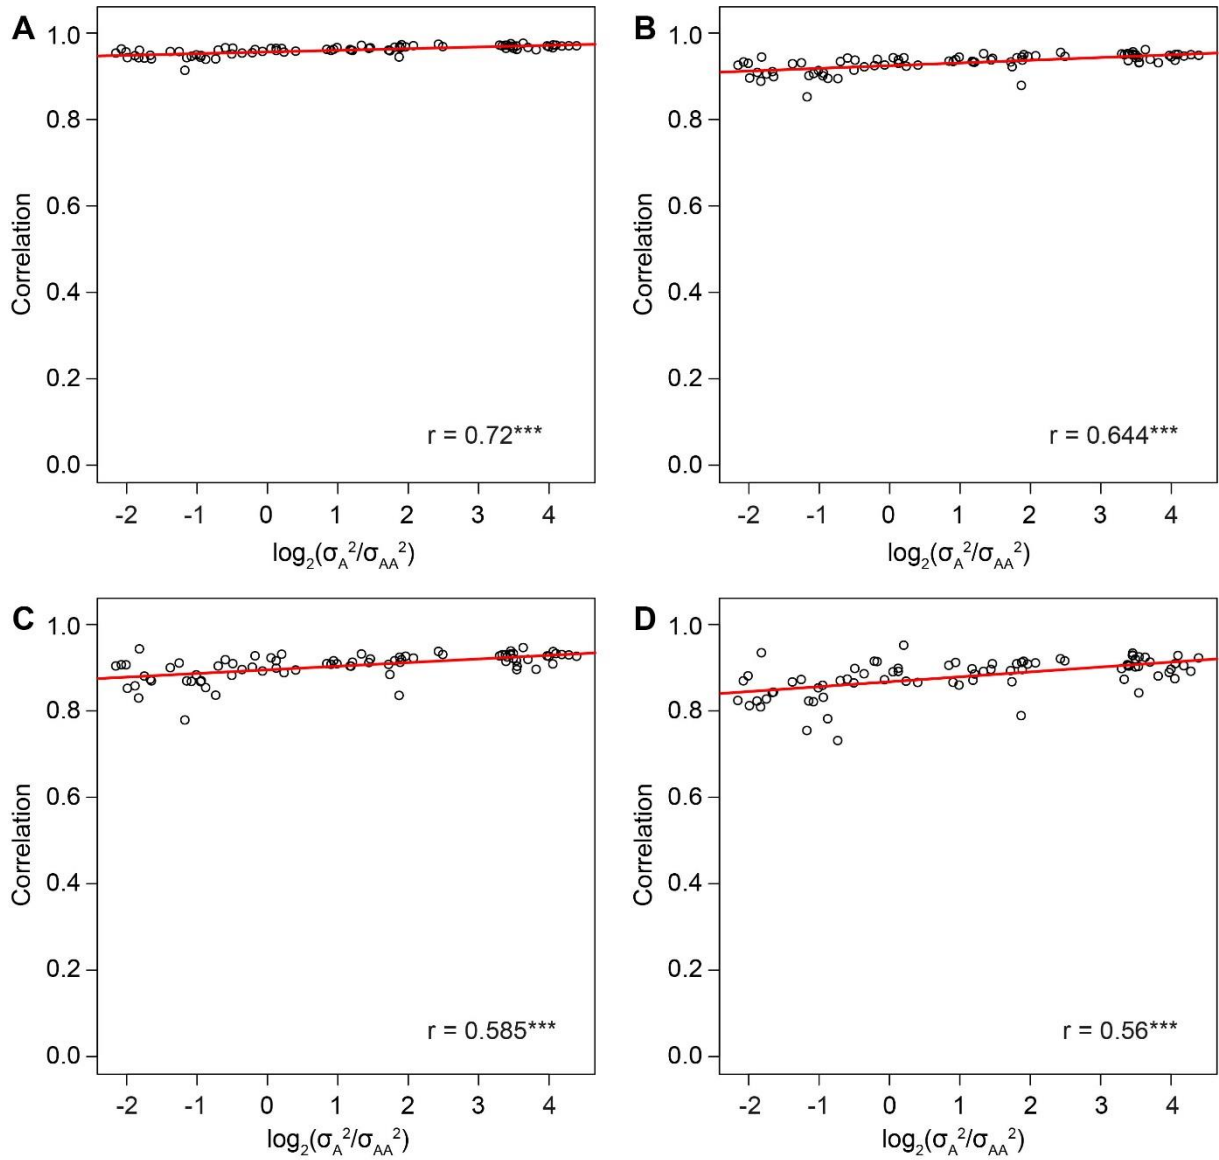

**Figure S4.** The correlations between the  $-\log_{10}(p)$  values for the epistatic effects obtained using the Q+K and the Q+2K model in simulated data sets with  $0.4 \leq h^2 < 0.7$  and different  $\sigma_A^2/\sigma_{AA}^2$  ratios. Each point in the figure represented the correlation between the  $-\log_{10}(p)$  values from the two models calculated in a specific simulated data set. The overall correlation between the correlations and the  $\log_2(\sigma_A^2/\sigma_{AA}^2)$  values across all data sets was displayed as the  $r$  value together with an indication of significance ( $*p < 0.1$ ,  $**p < 0.05$ ,  $***p < 0.01$ ). A threshold of  $-\log_{10}(p)$  values was applied to filter the marker pairs. Namely, only the marker pairs whose  $-\log_{10}(p)$  values were above the threshold in at least one of the two models were considered. In different panels, distinct threshold values were applied: A) 1, B) 2, C) 3 and D) 4.

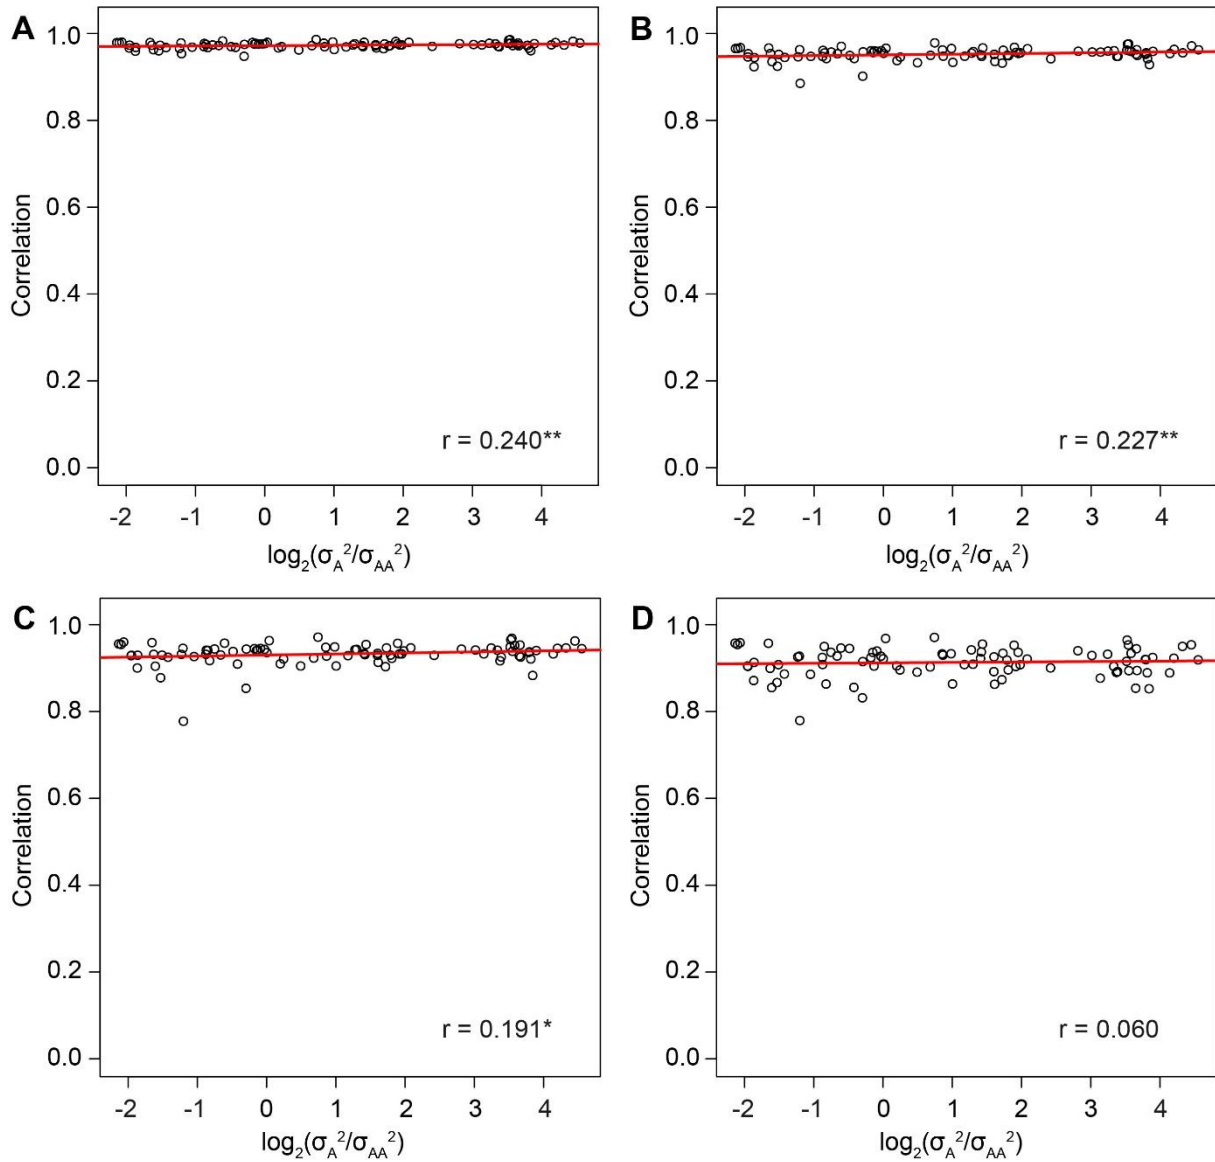

**Figure S5.** The correlations between the  $-\log_{10}(p)$  values for the epistatic effects obtained using the Q+K and the Q+2K model in simulated data sets with  $h^2 < 0.4$  and different  $\sigma_A^2/\sigma_{AA}^2$  ratios. Each point in the figure represented the correlation between the  $-\log_{10}(p)$  values from the two models calculated in a specific simulated data set. The overall correlation between the correlations and the  $\log_2(\sigma_A^2/\sigma_{AA}^2)$  values across all data sets was displayed as the  $r$  value together with an indication of significance ( $*p < 0.1$ ,  $**p < 0.05$ ,  $***p < 0.01$ ). A threshold of  $-\log_{10}(p)$  values was applied to filter the marker pairs. Namely, only the marker pairs whose  $-\log_{10}(p)$  values were above the threshold in at least one of the two models were considered. In different panels, distinct threshold values were applied: A) 1, B) 2, C) 3 and D) 4.

## Supplementary Tables

**Table S1.** The intervals defined for each simulated heritability ( $h^2$ ) as a criterion to filter the simulated data sets. When the estimated value ( $\hat{h}^2$ ) was contained in the corresponding interval, the simulated data set was kept.

| Simulated value ( $h^2$ ) | Interval for the estimation ( $\hat{h}^2$ ) |
|---------------------------|---------------------------------------------|
| 0.1                       | (0.05, 0.15)                                |
| 0.2                       | (0.15, 0.25)                                |
| 0.3                       | (0.25, 0.35)                                |
| 0.4                       | (0.35, 0.45)                                |
| 0.5                       | (0.45, 0.55)                                |
| 0.6                       | (0.55, 0.65)                                |
| 0.7                       | (0.65, 0.75)                                |
| 0.8                       | (0.75, 0.85)                                |
| 0.9                       | (0.85, 0.95)                                |

**Table S2.** The intervals defined for each simulated ratio of additive to additive-by-additive genetic variance ( $\sigma_A^2/\sigma_{AA}^2$ ) as a criterion to filter the simulated data sets. When the estimated value ( $\hat{\sigma}_A^2/\hat{\sigma}_{AA}^2$ ) was contained in the corresponding interval, the simulated data set was kept.

| Simulated value ( $\sigma_A^2/\sigma_{AA}^2$ ) | Interval for the estimation ( $\hat{\sigma}_A^2/\hat{\sigma}_{AA}^2$ ) |
|------------------------------------------------|------------------------------------------------------------------------|
| 0.25                                           | (0.125, 0.375)                                                         |
| 0.5                                            | (0.375, 0.75)                                                          |
| 1                                              | (0.75, 1.5)                                                            |
| 2                                              | (1.5, 3)                                                               |
| 4                                              | (3, 6)                                                                 |
| 8                                              | (6, 12)                                                                |
| 16                                             | (12, 24)                                                               |
